# Supplementary material for: One-Carbon Metabolism in Alzheimer’s Disease and Parkinson’s Disease Brain Tissue
Source: Nutrients. 2022 Jan 29;14(3):599. doi: 10.3390/nu14030599 (PMC8838558; doi:10.3390/nu14030599)
Supplement: Supplementary file 1 [file nutrients-14-00599-s001.zip › nutrients-1564958 - Supplementary Material A.xlsx]

## Sheet: Data
Group	Sex	Age	BMI	APOE	Post-mortem interval hours	Freezer Storage Years	B12 Supplement	Multivitamin Supplement	MMSE	UPDRS-M	Plaque Total	Tangle Total	NIA-Reagan Category	LB Stage	Diagnosis Years	THF	MTHF	SAM	SAH	Met	CTH	Bet	Cho	Hcy	Cys
PD-MCI	Male	89	22.36	3/3	6.5	17	No	No	25	34	7.75	3.75	criteria not met	III	6	0.101766	0.15238	13.8	17.85	67	795	25.15	114.5	92.2213	3333.88
PD-dem	Male	83	28.98	2/3	2	17	No	No	25		0	4.25	criteria not met	IIa	8	0.0988736	0.100877	8.9	13.6	63.5	322	6.9	129.5	36.296	2042.36
ND	Female	83	19.84	2/2	4.83	17	No	Yes	29	19	10	1.5	criteria not met	0		0.119695	0.168383	6.15	8.7	72	239.5	24.55	403	56.2333	4214.96
PD-dem	Male	73	23.4	2/3	2	17	No	No	7		12.25	2.25	low	III	13	0.0882158	0.122322	19.25	14.35	46.1	950	9.7	180	93.6507	2797.68
ND	Male	91	21.33	3/3	1.5	16	No	No	27	11	0	2.75	criteria not met	0		0.29723	0.258517	13.6	14.2	43.9	505	11.05	106	115.425	1794.63
ND	Male	82	20.31	3/3	3	16	No	No	26	0	4	3	criteria not met	0		0.131965	0.132453	10	13.25	45.25	282.5	60.5	143	158.04	3643.45
PD-dem	Female	84	24.88	3/3	2	16	No	No	21		2	1.5	low	IIa	22	0.0932183	0.224643	18.2	22.45	70.5	685	31.1	118	363.693	2859.93
ND	Male	82	25.88	3/3	2.16	16	No	Yes	28		3	4	criteria not met	0		0.108056	0.199436	13.1	9.25	27.95	188.5	42.65	203.5	15.748	1373.25
PD-dem	Male	72	22.78	2/3	3.5	16	No	No	25		0	3	criteria not met	III	17	0.295412	0.442434	11.55	14.3	58	55.5	15.35	186.5	43.96	2880.37
ND	Female	88	15.69	2/3	4.5	15	No	No			3.75	3.5	criteria not met	0		0.161363	0.247822	7.45	12.7	66	135.5	72	154	97.008	4384.36
ND	Female	87	19.92	2/3	2.5	15	No	No	26	1	4.5	4.25	criteria not met	0		0.0628612	0.0698931	3.89	14.05	99	1250	170.5	690	115.837	3350.07
ND	Male	73	30.77	2/3	2.5	15	No	Yes	30	4	5.5	3	criteria not met	0		0.0996792	0.032362	16.95	19.95	159	645	54	90.5	193.96	4861.07
ND	Male	89	27.47	3/3	3.33	15	No	No			6.5	3.5	criteria not met	0		0.12601	0.145594	12.9	14.55	156	488.5	12.2	79.5	93.5987	3425.03
PD-dem	Male	79	28.34	3/3	2.5	15	No	Yes			7.5	3	low	IV	4	0.145609	0.108072	10.65	11.4	92.5	121	58.5	166.5	32.8707	2651.4
PD	Female	87	21.99	2/3	2.16	15	No	Yes	28	24	2	1.5	criteria not met	III	9	0.128273	0.117916	7.4	12.6	134	170	69.5	222	24.4227	4504.01
ND	Male	92	20.73	3/3	3	15	No	Yes	26	14	8	4.5	criteria not met	0		0.153125	0.198812	9.7	12.1	103	184.5	37.25	95.5	63.4067	2893.25
PD-dem	Female	82	21.39	3/3	4.16	15	No	No	29		0	6.5	criteria not met	III	19		0.033355	5.95	19.4	112	1030	60.5	375	189.013	4971.29
ND	Male	97	23.18	2/3	1.5	14	No	Yes	30	13	0	5	criteria not met	0		0.228732	0.138972	5.8	9.8	94	124.5	31.8	830	40.1053	3261.24
ND	Female	75	28.36	3/4	2.75	14	No	Yes	29	2	0	5	criteria not met	0		0.131418	0.148373	16.45	17.05	101.5	380.5	43.95	94.5	50.1347	1667.79
ND	Male	86	25.29	3/3	4.75	14	No	Yes	28	13	0	1	criteria not met	0		0.179714	0.140045	7.75	11.05	91.5	152	29.65	223	29.272	3933.48
ND	Male	89	24.33	3/3	5.5	14	No	Yes	30		0	2	criteria not met	0		0.196572	0.224015	11.2	14.3	43.95	443	63.5	101	80.6787	1992.16
ND	Female	91		2/3	5	14	No	Yes		14	0	5	criteria not met	0		0.24582	0.312904	11.3	14.05	96.5	156	50.5	225	32.5707	2649.13
ND	Male	76	23.43	3/4	2.33	13	No	No	29	3	5.5	0	criteria not met	0		0.20901	0.405318	15.55	16.05	47.65	770	55.5	76.5	88.572	1994.29
ND	Male	71	29.11	3/3	3	13	No	No	26		0	0	criteria not met	0		0.124571	0.126951	9.75	10.6	61.5	206	86.5	236.5	36.6787	2649.12
PD	Female	79	28.59	3/3	3.16	13	No	No	29		7.5	3.5	criteria not met	III	14	0.175656	0.198363	7.2	14.05	74	282.5	57	153	156.48	3306.51
PD	Male	91	19.71	3/3	2.75	12	Yes	Yes	26	17	0	5	criteria not met	III	12	0.147431	0.11933	14.7	12.1	68.5	302	54	155.5	40.2787	2811.17
PD-dem	Male	81	69.82	2/3	4	12	Yes	Yes	19	71	0	7.5	criteria not met	III	14	0.0787159	0.190648	12.05	18.6	95.5	346	25.45	150.5	56.4773	3885.32
ND	Female	99	23.3	3/3	3.5	12	No	No	29	8	0	3.5	criteria not met	0		0.0591967	0.0154186	14.6	18	98.5	1435	102.5	157.5	274.013	4649.83
AD	Male	85	24.27	3/3	3	12	No	Yes	23	1	15	15	high	0	7	0.064628	0.0739237	15.5	13.35	69	1025	55.5	217.5	142.72	4038.71
AD	Female	60	20.04	3/3	5	12	No	No	18		15	15	high	0	9	0.0398632	0.17521	15.45	18.7	250.5	510	12.55	125	442.8	9180.48
PD-dem	Female	87	29.64	3/3	3	12	No	Yes	13		2.5	0.5	low	IV	21	0.124313	0.207855	16.4	12.75	33.65	375.5	65	145.5	63.3613	2266.73
ND	Male	80	26.58	2/2	3.5	12	No	No			4.5	5	criteria not met	0		0.127785	0.412665	10.35	11.95	197.5	284	35.7	84	80.092	6257.13
AD	Female	68	17.61	3/3	4.16	11	No	No	0		15	15	high	0	8	0.0572173	0.0907044	17.55	18.2	76	1190	12.45	121.5	458.973	4568.39
ND	Male	61	19.91	3/3	2.33	11	No	No			0.5	0.5	criteria not met	0		0.164912	0.180586	8.55	10.05	47.3	197	73.5	181	73.1947	1969.29
ND	Female	59	24.76	3/3	3.15	11	No	No			1.5	0.5	criteria not met	0		0.0275429	0.102449	16.6	18.55	72.5	1560	45.75	92	235.4	1309.51
ND	Female	95	24.13	3/3	2.5	11	No	Yes	28	8	0	6.5	criteria not met	0		0.251819	0.308713	11.1	9.25	37.2	186	90	392	18.3947	1733.27
PD-MCI	Male	75	18.33	3/3	2.33	11	No	No			0	3.5	criteria not met	IV	20	0.0827288	0.0693284	18.95	15.7	76.5	715	14.3	85	121.652	2223.12
PD-dem	Male	78	16.37	2/2	3.16	11	No	No	24		0	6.5	criteria not met	III	19	0.11441	0.282131	11.55	17.25	105	407.5	10.5	126	77.024	4292.51
PD	Female	84	19.53	3/3	5	11	No	Yes			0	5.5	criteria not met	III	20	0.120564	0.15815	23.5	10.5	48.55	555	32.4	88.5	80.2747	2240.99
ND	Male	93	23.69	3/3	3	11	No	No	30	13	0	1	not AD	0		0.317781	0.433119	10.25	11	57	147.5	62	122	53.248	2998.96
ND	Male	79	23.28	3/3	3	11	No	No	29	3	0	2.5	not AD	0		0.0765787	0.130734	13	14.65	88	800	12.85	250	320.493	3367.35
ND	Male	74		2/3	3.25	11	No	No			0	2	criteria not met	0		0.0639547	0.143491	16.5	16.5	78	2360	16.6	123	228.147	3039.27
PD-MCI	Male	85	55.8	3/4	2.75	11	No	No			0	5.5	Criteria not met	IV	11	0.152552	0.289365	7.9	11.35	45.5	182.5	5.35	104	98.5573	3940.63
PD-MCI	Female	80	17.73	3/4	3.25	11	No	No	27		11	7	Criteria not met	IV	7	0.112673	0.315592	14.15	11.7	54.5	119	17.7	73.5	75.5013	3300.91
PD	Female	92	21.7	3/4	3.67	10	No	No	27	39	12	6.5	Criteria not met	IIb	10	0.123975	0.173837	12.2	14.6	57.5	505	56.5	124.5	170.667	2606.84
AD	Male	89	23.75	2/3	2.2	10	Yes	Yes	21	9	12.5	10	high	0	11	0.147627	0.194937	21.1	10.5	44.1	418.5	10.75	92.5	100.513	1715.84
AD	Female	93	18.99	3/3	2.83	10	No	No	19		15	11.5	high	0	6	0.111591	0.240434	11.3	14.4	55	423	68	95	232.88	5048.89
AD	Male	64	20.07	3/3	2.33	10	No	No	1		14.5	15	high	0	9	0.111222	0.264474	17.25	13	56.5	354.5	19.45	100.5	44.316	1885.52
PD	Female	76	16.23	3/3	3.5	10	No	No	27	47.5	4	6	Criteria not met	III	9	0.118991	0.323504	16.55	14.15	184	314.5	84	280	51.8307	3008.79
AD	Male	83	20.8	4/4	3	10	No	No	11		10	14.5	high	0	7	0.077882	0.0737794	21.85	10.8	36.5	775	25.2	171.5	105.157	3277.83
PD-dem	Male	80	25.64	2/3	2.42	10	No	No	19	40	0	5	Criteria not met	III	17	0.0356007	0.024136	12	13.5	43.5	1390	81	138	179.547	1476.67
AD	Male	82	18.67	3/3	2.95	10	No	No	19		14.5	15	high	0	8	0.182163	0.252816	9.4	8.45	37.55	163.5	71.5	229.5	31.5187	1864.91
PD-MCI	Male	89	20.97	3/3	2.58	10	No	No	22	14	0	6	Criteria not met	III	6	0.0540208	0.0801182	24.3	13.9	59	770	55	92.5	176.2	2573.35
PD	Male	78	21.03	3/3	2.75	10	No	Yes			1	2.5	Criteria not met	III	8	0.152523	0.252745	14.2	19.3	107.5	610	9.65	164	148.027	6564.36
AD	Female	86	25.48	3/3	2.52	10	No	No	23		14.5	15	high	0	4	0.17747	0.33728	11.05	10.85	43.3	337.5	35.45	114.5	48.288	1612.13
PD-dem	Male	85	20.51	3/3	5.42	9	No	Yes	19	59	4.5	6	low	IV	44	0.135014	0.368464	9.45	11.6	46.1	135.5	13.4	338.5	52.9373	4445.8
PD-dem	Female	87	39.24	3/3	2.08	9	No	No	23		0	6.5	Criteria not met	IV	22	0.108552	0.250374	17.65	16.05	52.5	1560	11.05	135.5	332.667	3780.67
PD-dem	Male	79	28.12	3/3	3.75	9	Yes	No	21	28	0	6	Criteria not met	III	23	0.136396	0.215586	7.4	11.55	82	131.5	17.1	99	51.8653	4383.71
ND	Female	88	21.48	3/4	1.25	9	No	Yes	29	6	14	3.5	Criteria not met	0		0.0750024	0.174536	19.5	13	49.15	1605	18.5	132	307.227	2452.83
PD-dem	Male	83	25.07	3/4	3.75	9	No	Yes	22	37	1.5	7	low	IV	15	0.120777	0.177554	12.8	18.55	83	510	53	175.5	185.467	4897.97
AD	Female	89	25.62	3/3	2.7	9	Yes	No	11	20	15	15	high	0	2	0.111951	0.321214	13.65	13.3	98.5	301.5	23.9	72	117.292	3944.97
PD-dem	Male	86	24.21	3/3	3	9	No	No	17		0	7	Criteria not met	IV	6	0.00621701	0.0682323	15.3	15.8	125	1225	13.85	49.6	570.68	7855.24
PD-dem	Male	74	15.88	3/3	3.42	9	No	Yes	20	66	2.5	4	low	III	29	0.103342	0.199262	15.4	21.2	94	1400	9.7	113.5	154.44	4730.8
PD-dem	Male	69	29.61	3/3	3.37	9	No	No	24	45	9.5	2	low	IV	15	0.0673548	0.0851805	15.15	17.25	55.5	780	10.1	81	101.953	4230.05
AD	Male	63	19.93	3/4	5.17	9	No	No	14		14.5	15	high	0	10	0.143193	0.441258	21.05	17.05	127	413	16.35	88.5	58.0107	3710.73
PD-dem	Female	70	27.74	3/3	4.42	9	No	No	27	48	1.5	1	low	III	13	0.0935012	0.142019	18.95	14.3	114.5	389	14.2	49.35	94.8027	3495.55
PD-dem	Male	76	25.72	2/3	3.37	9	No	No	20		0	5.5	Criteria not met	III	12		0.0489956	12.15	19.4	82.5	4060	25.25	99	469.8	6375.07
PD	Male	80	19.11	3/3	2.83	8	No	No	27		0	4	Criteria not met	III	10	0.0889042	0.108775	25.9	14.15	53	406	38.5	235.5	28.5227	2700.79
AD	Male	74	25.86	3/4	2.58	8	No	No	14	2	14	14	high	0	4	0.0896036	0.131378	24.4	14.25	28.65	1125	54.5	86	209.827	2964.93
PD-dem	Male	81	22.66	3/3	3.62	8	No	No			0	3	Criteria not met	III	23	0.0253048	0.00513954	18.1	20.3	71	2460	110.5	149	456.093	2969.95
PD	Male	83	27.72	4/4	3	8	No	Yes	29	39.5	0	7	Criteria not met	IIa	13	0.100014	0.182309	19.2	15.9	92.5	1415	128	119.5	169.12	2905.89
PD	Male	90	16.47	3/3	2.25	8	No	Yes	29	8	8.5	4.5	Criteria not met	III	2	0.0939866	0.133024	14.5	14.2	62.5	540	48.7	150.5	124.072	2567.04
AD	Male	85	28.34	3/4	3.58	8	No	Yes	16	15	13.5	13	high	0	14	0.0242545	0.125626	14.6	18.4	107	1965	10.25	113.5	511.213	10173.9
AD	Female	76	24.41	3/3	3.08	8	No	No	6	1	15	15	high	0	7	0.128938	0.348066	23.75	15.55	150.5	192	11.3	83.5	63.528	5480.57
ND	Male	73	23.66		4.12	8	No	No			0	2.25	Criteria not met	0		0.113378	0.132182	4.11	12	94	495.5	43.35	333.5	110.515	4173.64
AD	Male	80	26.22	4/4	3	8	No	Yes	27	10	14	12	high	0	20	0.0934513	0.173222	10.4	8.75	34.55	127	15.55	78.5	43.9613	2032.8
PD-MCI	Female	88	16.35	3/3	4	8	No	Yes	27	45	0.5	6.5	Criteria not met	IV	16	0.0701656	0.178395	11.2	17.6	124.5	307.5	26.65	204	98.4373	4655.76
AD	Female	85	16.55	3/4	3.11	8	No	No	22	2	12	11.5	high	0	8	0.210526	0.424546	14.75	15.7	123	323.5	20.35	100	53.644	3309.01
ND	Female	75	22.66	3/3	2.5	8	No	Yes	28	5	0	2.5	Criteria not met	0		0.0833948	0.156991	24.75	18.3	137	425	39.35	86.5	104.537	4086.95
PD-MCI	Female	80	29.3	3/3	3.47	8	No	Yes	19	12	13	5	Criteria not met	IV	12	0.13906	0.215315	5.85	11.4	91	229.5	3.88	84.5	150.973	4811.04
AD	Female	92	23	3/4	3.73	8	No	Yes	7		15	15	high	0	17	0.0332832	0.0597795	13.75	16.65	175.5	555	30.9	91.5	160.467	6346.83
AD	Female	85	34.49	3/3	3.42	8	No	No	2	22	14	15	high	0	8	0.0569084	0.117989	22.95	21.25	137.5	1235	33.95	175.5	221.933	5820.72
AD	Male	77	25.57	3/4	3.62	8	No	Yes	10	9	15	15	high	0	12	0.146059	0.253846	12	15	96	380.5	40.6	183	60.3707	3216.21
PD-MCI	Male	78	22.96	3/3	3.7	7	Yes	No	25	40	13.5	6	Criteria not met	IV	13	0.18304	0.317404	8.15	10.55	53	147.5	62	172.5	50.836	2231.68
AD	Male	85	27.65	3/4	3.5	7	No	No	17		14	14.5	high	0	11	0.0415418	0.237806	13.55	13.5	137.5	210	20.25	55.5	78.6373	4256.28
AD	Male	80	25.47	3/4	4.23	7	No	No	17		14.5	15	high	0	12	0.138748	0.210918	13.7	16.05	85.5	225.5	9.3	104.5	303.107	8042.77
AD	Male	82	24.66	2/4	3.98	7	No	No	21		13.5	10	high	0	4	0.111804	0.407014	16.3	13.8	127.5	294.5	55.5	72	75.676	5204.17
PD-dem	Male	82	20.73	2/3	4.25	7	No	No	14	58	0	5	Criteria not met	IV	22	0.118251	0.244699	13.3	15.95	102.5	520	8.1	102	99.4947	4159.69
ND	Male	87	20.18	2/3	3.55	7	No	Yes	28	0	0	4.5	Criteria not met	0		0.0787643	0.104128	13.55	14.8	75	1005	20.45	218.5	46.424	2735.73
PD-MCI	Female	76	25.26	3/3	2.18	7	No	Yes	21	28	0	4	Criteria not met	III	9	0.0529905	0.0489713	8.3	14.75	86.5	870	21.15	176	261.507	3070.84
AD	Male	73	25.59	3/4	4.83	7	No	Yes	7	39	14.5	15	high	0	11	0.0343261	0.0536661	8.4	12.2	79.5	243	30	123	179.413	5367.85
PD	Female	88	20.31	2/3	2.5	7	No	Yes	28	37	12.5	12.5	Criteria not met	IV	5	0.155498	0.378444	8.4	9.35	43.15	147.5	48.05	344.5	22.6093	1469.88
AD	Female	81	22.66	3/4	3.85	6	No	No	23	7	14.5	15	high	0	10	0.0785512	0.310304	9.25	9.85	178.5	351	10.9	30.75	254.8	7525.71
PD-dem	Female	72	22.02	2/3	3.58	6	No	No	23	72	10	2	low	IV	18	0.23432	0.351726	11.7	13.25	90.5	299.5	10.3	69.5	104.428	4507.13
AD	Male	83	25.19	3/4	4	6	No	Yes	14	10	14	13	high	0	8	0.0997695	0.212066	7.5	16.35	143	387.5	46.75	357	344.64	6420.27
PD-dem	Male	79	25.88		5.07	6	No	No			0	8.5	Criteria not met	IV	13	0.219859	0.432784	7.9	14	121.5	101	11.9	214.5	106.561	5134.88
AD	Male	80	24.34	3/4	3.83	6	No	No	25	2	15	11	high	0	19	0.12542	0.255862	19.3	17.35	125	565	10.15	89.5	33.7373	1781.76
AD	Female	83	25.82	3/3	3.62	6	No	No	17	60	13	13.5	high	0	10	0.18723	0.243437	16.5	10.3	52.5	570	10.45	89	105.017	3405.32
AD	Female	84	26.86	3/3	3.33	6	No	No	24	59	15	11	high	0	1	0.038824	0.0963075	12.8	16.65	160	1125	18.65	85	251.24	5624.47
ND	Female	82	19.81	2/3	2.07	6	No	Yes	29	1	1	1.5	Criteria not met	0		0.182931	0.213971	9.85	11.2	59.5	326.5	62.5	323	68.4667	3445.45
PD-dem	Male	85	35.68	2/4	3.97	6	No	Yes	23	40	0	5	Criteria not met	III	14	0.107403	0.145533	9	18.65	77	790	42.5	267.5	141.08	4408.79
ND	Male	82	30.77	3/3	3.33	6	No	No	30		0	3	Criteria not met	0		0.093534	0.137105	20.95	17.45	45.95	1710	16.1	175	184.613	2081.27
PD-MCI	Male	79		3/3	2.5	6	No	Yes	29		13	2	low	IV	14	0.176273	0.33437	10.4	13.35	43.7	555	38.3	147	252.04	4067.45
PD-MCI	Male	73	29.65	3/4	5.87	6	No	No	28		6.5	7	Criteria not met	IV	5	0.22151	0.31677	6.7	13.25	91	131	48.35	150	41.3067	3259.39
ND	Female	93	18.77	3/3	2.92	6	Yes	Yes	29	7	13.5	4	Criteria not met	0		0.25999	0.323153	14	12.25	66	202	43.45	361	24.5333	2576.47
AD	Male	81	25.43	3/3	3.08	6	No	No	25		14	14.5	high	0	2	0.171511	0.301993	18.75	14.5	118	234.5	22.55	54.5	122.659	4813.43
PD-MCI	Male	81	23.09	3/3	2.38	6	No	No	26	50	13.5	5.5	Criteria not met	IV	14	0.13973	0.249692	20.35	8.85	45.65	409	29.1	121.5	56.9307	1480.44
ND	Male	83	29.37	3/4	4.25	5	No	No	29	6	5	4	Criteria not met	0		0.261778	0.297117	24.15	16.05	69	413	70.5	80.5	79.3907	2303.6
PD-MCI	Male	80		3/3	2.6	5	No	No	23	30	0	7	low	IV	21	0.200901	0.263459	11.65	12.15	68.5	115.5	32.7	97.5	42.552	3239.19
AD	Male	91	24.44	2/4	2.97	5	No	No	8	20	14.5	14	high	0	14	0.058083	0.134929	11.75	14.5	90.5	409.5	26.2	135.5	154.08	4899.43
PD-MCI	Male	78	25.47	2/3	3.3	5	No	No	27	49	0	6	Criteria not met	IV	17	0.130498	0.169758	9.8	15.5	139.5	381.5	25.4	219	80.904	2398.67
ND	Male	79	22.66	2/3	4.3	5	Yes	Yes	28	0	0	1	Criteria not met	0		0.0276095	0.125223	9.6	14.6	81.5	600	53	385	142.667	91.72
PD-MCI	Male	70	16.39	3/3	3.9	5	Yes	No			13.5	3	Criteria not met	IV	26		0.123992	6.3	19.7	341.5	1600	10.3	201	420.267	5560.95
PD-MCI	Male	92	20.72	3/3	2.42	5	No	No	29	33	0.5	7	Criteria not met	III	9		0.0374827	19.75	18.55	61	1740	67	132.5	134.88	1721.56
PD-dem	Male	83	24.62	3/3	2.47	5	Yes	No	15	72	0	5.5	Criteria not met	IV	21	0.143187	0.186216	21.25	14.2	63.5	480.5	32.05	46.6	54.596	2832.99
ND	Female	53	26.86	3/3	3.95	4	No	No			6	2	low	0		0.0683655	0.202687	17.25	19.25	91.5	1535	31.45	174	185.24	2579.07
AD	Female	59	20.93	3/3	1.83	4	No	No	3		14.5	15	high	0	13	0.167906	0.187545	23.4	12.3	76	940	63	113.5	150.467	3128.63
PD	Male	95	25.85	3/3	5.23	4	No	Yes	29	19	3.5	5	Criteria not met	III	3	0.183561	0.210569	10.65	9.55	41.45	155	53	200.5	57.74	3923.39
ND	Male	90	36.8	3/3	3.41	4	No	Yes	27	8	0.5	1.5	Criteria not met	0		0.0547362	0.198188	14.6	8.4	97	290	9.95	47	74.7467	4602.87
PD-dem	Male	79	26.96	3/3	3.17	4	No	No	29	22	0	6.5	Criteria not met	III	14	0.0730207	0.149559	11.25	15.2	48.15	860	58.5	137	256.067	4402.4
AD	Female	93	29.06	3/3	2.17	4	No	No	13	12	15	11	high	0	7	0.0961251	0.115033	20	16.1	84.5	1095	15.95	75	343.68	3037.63
AD	Female	82	23.94	3/3	4	4	No	No	19		15	14.5	high	0	15	0.069751	0.132625	11.85	18.75	124.5	1195	14	93	271.32	7176.25
AD	Male	83	28.25	3/4	4.25	4	No	No			14.5	15	high	0	9	0.0941935	0.371986	11.05	13.15	269.5	203.5	14.65	75	143.933	8230.8
PD-MCI	Male	84	27.25	3/3	3	3	No	Yes	25	1	0	6.5	Criteria not met	III	1	0.185186	0.365297	18.7	14.8	111	469	24.2	355.5	49.66	3620.85
PD-dem	Male	83	23.81	3/3	2.66	3	No	No	24		1	6.5	low	IV	16	0.100722	0.160459	25.7	15.6	125	1475	10.15	41.55	203.253	3744.76
PD-dem	Female	71	19.71	3/3	3.08	3	Yes	Yes	10		1.5	5.5	low	IV	48	0.0975204	0.236854	7.4	12.35	43.7	234	24.85	134	71.104	3390.04
PD-dem	Male	81	26.83	3/4	4.92	3	No	Yes	10	47	0	4	Criteria not met	III	16	0.139146	0.273076	14.3	13.65	70	310.5	6.55	101.5	51.9907	1602.09
ND	Female	87	39.9	3/4	3.08	3	Yes	No	28	12	0	4.5	Criteria not met	0		0.215028	0.427806	10.6	9.25	55.5	149.5	73.5	196.5	32.5173	2764.12
PD-MCI	Male	89	25.92	3/3	4.18	3	No	Yes	26	31	4	4.5	Criteria not met	IV	15	0.0815183	0.216175	11.8	18.2	183.5	338.5	13.3	113	65.6627	4686.43
PD-MCI	Female	83	26.23	3/3	3.15	3	No	No	25	40	0	3.5	Criteria not met	III	4	0.14833	0.373117	18.2	12.5	87.5	339.5	20.45	100	67.928	1676.43
PD-dem	Male	76	28.21	2/3	3.3	3	Yes	No	26	42	0	5.5	Criteria not met	IV	6	0.0608635	0.137101	7.2	12.3	74.5	945	13.35	110	105.028	1983.97
PD-dem	Female	86	33.31	3/3	3.87	3	No	Yes	25		0	6.5	Criteria not met	III	10	0.0903091	0.135351	8.4	11.35	98.5	85.5	19.6	126	15.2333	780.613
AD	Male	83	25.86	3/4	2.8	3	No	No	14		14	15	high	0	9	0.121019	0.223089	13.75	14.35	91	359	24.6	179.5	49.6667	1762.49
PD	Male	87	24.25	3/3	3.15	3	No	Yes	27	53	10.5	5	Criteria not met	IV	29	0.0505874	0.0970402	13.3	16.3	53	1485	33.65	170	184.24	3123.56
PD	Male	75	24.09	3/3	3.66	3	Yes	No	29		2.5	5.5	Criteria not met	III	4	0.145959	0.354976	10.25	12.15	67	103.5	14.7	98.5	38.5653	2948.87
PD-dem	Male	80	29.07	3/3	4.37	3	No	No	13		0.5	5.5	low	IV	15	0.14589	0.261599	12.4	16.05	137.5	486	12.55	101	196.693	6950.59
